# Supplementary material for: Identifying refugia from the synergistic threats of climate change and invasive species
Source: Copernicus journal article supplement (doi:10.5194/we-25-221-2025), 2025-12-04
Supplement: Supplementary file [file we-25-221-2025-supplement-title-page.pdf › we-25-221-2025-supplement-title-page.pdf]

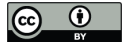

## *Supplement of*

# **Identifying refugia from the synergistic threats of climate change and invasive species**

**Finnbar Lee et al.**

*Correspondence to:* Finnbar Lee ([finnbar.lee@cawthron.org.nz](mailto:finnbar.lee@cawthron.org.nz))

- [we-25-221-2025-supplement-title-page.pdf](#)
- [00\\_RHM\\_SM.r](#)

The copyright of individual parts of the supplement might differ from the article licence.
